# Supplementary material for: Progressive early passive and active exercise therapy after surgical rotator cuff repair – study protocol for a randomized controlled trial (the CUT-N-MOVE trial)
Source: Springer Nature journal article supplement (doi:10.1186/s13063-018-2839-5), 2018-09-03
Supplement: MOESM2 [file 16093826]

**NOTES**

**In the clinic**

**Sling week 1-2 postop:**  
Shoulder immobilized in standard fixed sling

**Sling week 3-5 postop:**  
Shoulder immobilized in standard sling

**Repetitions:**  
3 sets of 10 repetitions

**Movement restrictions for AAROM and AROM:**

Flexion: 0°-90° (week 1-5)  
Abduction: 0°-90° (week 1-5)  
External rot.: 0° (week 1-2)  
Internal rotation: no restrictions

**Repaired tendon(s) are protected**

**Specify perceived pain on a scale from 0-10:**

0 equals no pain  
10 equals the worst imaginable  
Pain below 5 is permitted during exercise therapy.  
Pain should drop to below 2 after exercise therapy.

| <b>Part 1: Tendon protection</b> |                                           | Wk | 1 | 2 | 3 | 4 | 5 | 6 | 7 | 8 | 9 | 10 | 12 |
|----------------------------------|-------------------------------------------|----|---|---|---|---|---|---|---|---|---|----|----|
| <b>A</b>                         | Active elbow extension (supine/ standing) |    | • | • | • | • | • |   |   |   |   |    |    |
| <b>B</b>                         | Vein pump (spread/collect fingers)        |    | • | • | • | • | • |   |   |   |   |    |    |
| <b>C</b>                         | Rotate forearm (supination/ pronation)    |    | • | • | • | • | • |   |   |   |   |    |    |
| <b>D</b>                         | Lift sternum (retraction of shoulders)    |    | • | • | • | • | • |   |   |   |   |    |    |
| <b>E</b>                         | Head lateral flexion                      |    | • | • | • | • | • |   |   |   |   |    |    |
| <b>F</b>                         | Cervical flexion                          |    | • | • | • | • | • |   |   |   |   |    |    |

Exercises in sling

| <b>Part 2:</b>                         |                                             | Wk | 1 | 2 | 3 | 4 | 5 | 6 | 7 | 8 | 9 | 10 | 12 |
|----------------------------------------|---------------------------------------------|----|---|---|---|---|---|---|---|---|---|----|----|
| <b>Passive range of motion (by PT)</b> |                                             |    |   |   |   |   |   |   |   |   |   |    |    |
| <b>1</b>                               | Flexion                                     |    | • | • | • | • | • |   |   |   |   |    |    |
| <b>2</b>                               | Abduction                                   |    | • | • | • | • | • |   |   |   |   |    |    |
| <b>3</b>                               | Supine external rotation w. 20-60 deg. abd. |    | • | • | • | • | • |   |   |   |   |    |    |
| <b>4</b>                               | When needed manual guiding of scapula       |    | • | • | • | • | • |   |   |   |   |    |    |
| <b>5</b>                               | When needed manual therapy                  |    | • | • | • | • | • |   |   |   |   |    |    |

PROM

| <b>Assisted active range of motion</b> |                                        | Wk | 1 | 2 | 3 | 4 | 5 | 6 | 7 | 8 | 9 | 10 | 12 |
|----------------------------------------|----------------------------------------|----|---|---|---|---|---|---|---|---|---|----|----|
| <b>6</b>                               | Reach the foot (flexion)               |    |   | • | • | • | • |   |   |   |   |    |    |
| <b>7</b>                               | Wash the table (flexion on table)      |    |   | • | • | • | • |   |   |   |   |    |    |
| <b>8</b>                               | Supine bench press w/ broomstick       |    |   | • | • | • | • | • |   |   |   |    |    |
| <b>9</b>                               | Flexion/ scaption w/ jump rope         |    |   | • | • | • | • | • |   |   |   |    |    |
| <b>10</b>                              | Abduction w/ broomstick                |    |   | • | • | • | • | • |   |   |   |    |    |
| <b>11</b>                              | Supine external rotation w/ broomstick |    |   | • | • | • | • | • |   |   |   |    |    |

AAROM

| <b>Isometric hold</b> |                                              | Wk | 1 | 2 | 3 | 4 | 5 | 6 | 7 | 8 | 9 | 10 | 12 |
|-----------------------|----------------------------------------------|----|---|---|---|---|---|---|---|---|---|----|----|
| <b>G</b>              | Squeeze a ball                               |    |   | • | • | • | • | • | • | • |   |    |    |
| <b>H</b>              | Adduction                                    |    |   | • | • | • | • | • | • | • |   |    |    |
| <b>I</b>              | Internal rotation (not subscapularis lesion) |    |   | • | • | • | • | • | • | • |   |    |    |
| <b>J</b>              | External rotation (not infraspinatus lesion) |    |   | • | • | • | • | • | • | • |   |    |    |
| <b>K</b>              | Abduction                                    |    |   | • | • | • | • | • | • | • |   |    |    |
| <b>L</b>              | Low row (against table)                      |    |   | • | • | • | • | • | • | • |   |    |    |
| <b>M</b>              | Flexion against wall                         |    |   | • | • | • | • | • | • | • |   |    |    |
| <b>N</b>              | Extension against wall (flexed elbow)        |    |   | • | • | • | • | • | • | • |   |    |    |

STRENGTH

| <b>Active exercise closed and open chain</b> |                                              | Wk | 1 | 2 | 3 | 4 | 5 | 6 | 7 | 8 | 9 | 10 | 12 |
|----------------------------------------------|----------------------------------------------|----|---|---|---|---|---|---|---|---|---|----|----|
| <b>12</b>                                    | Downward pressure in abduction               |    |   |   | • | • | • | • | • | • | • | •  | •  |
| <b>13</b>                                    | Low row w/ Thera-Band (extension)            |    |   |   | • | • | • | • | • | • | • | •  | •  |
| <b>14</b>                                    | Incline plinth sliding (flexion)             |    |   |   | • | • | • | • | • | • | • | •  | •  |
| <b>15</b>                                    | Sitting bilateral downward press             |    |   |   | • | • | • | • | • | • | • | •  | •  |
| <b>16</b>                                    | High row with pulley                         |    |   |   | • | • | • | • | • | • | • | •  | •  |
| <b>17</b>                                    | Fitter                                       |    |   |   | • | • | • | • | • | • | • | •  | •  |
| <b>18</b>                                    | Prone low row                                |    |   |   | • | • | • | • | • | • | • | •  | •  |
| <b>19</b>                                    | Supine scaption on sloping board             |    |   |   | • | • | • | • | • | • | • | •  | •  |
| <b>20</b>                                    | Supine internal rotation w/ pulley           |    |   |   | • | • | • | • | • | • | • | •  | •  |
| <b>21</b>                                    | Supine external rotation w/ pulley           |    |   |   | • | • | • | • | • | • | • | •  | •  |
| <b>22</b>                                    | Standing internal rotation w/ pulley         |    |   |   | • | • | • | • | • | • | • | •  | •  |
| <b>23</b>                                    | Lawn mover                                   |    |   |   | • | • | • | • | • | • | • | •  | •  |
| <b>24</b>                                    | Standing external rotation w/ pulley         |    |   |   | • | • | • | • | • | • | • | •  | •  |
| <b>25</b>                                    | Wall slide                                   |    |   |   | • | • | • | • | • | • | • | •  | •  |
| <b>26</b>                                    | Backstroke                                   |    |   |   | • | • | • | • | • | • | • | •  | •  |
| <b>27</b>                                    | Standing arm elevation in scapular plane     |    |   |   | • | • | • | • | • | • | • | •  | •  |
| <b>28</b>                                    | Standing shoulder flexion                    |    |   |   | • | • | • | • | • | • | • | •  | •  |
| <b>29</b>                                    | Sidelying external rotation                  |    |   |   | • | • | • | • | • | • | • | •  | •  |
| <b>30</b>                                    | Sidelying shoulder flexion                   |    |   |   | • | • | • | • | • | • | • | •  | •  |
| <b>31</b>                                    | Prone drop/ grab ball                        |    |   |   | • | • | • | • | • | • | • | •  | •  |
| <b>32</b>                                    | Prone external rotation w. 90 deg. elevation |    |   |   | • | • | • | • | • | • | • | •  | •  |
| <b>33</b>                                    | Standing protraction w/ pulley (throwing)    |    |   |   | • | • | • | • | • | • | • | •  | •  |
| <b>34</b>                                    | Standing retraction w/ pulley (throwing)     |    |   |   | • | • | • | • | • | • | • | •  | •  |

Level 1

Level 2

Level 3

NOTES

In the clinic

**Sling week 1-2 postop:**  
Shoulder immobilized in standard fixed sling

**Sling week 3-5 postop:**  
Shoulder immobilized in standard sling

**Repetitions:**  
3 sets of 10 repetitions

**Movement restrictions:**  
No active movement within the first 5 weeks postop.

**Specify perceived pain on a scale from 0-10:**  
0 equals no pain 10 equals the worst imaginable  
Pain below 5 is permitted during exercise therapy.  
Pain should drop to below 2 after exercise therapy.

| Part 1: Tendon protection |                                           | Wk | 1 | 2 | 3 | 4 | 5 | 6 | 7 | 8 | 9 | 10 | 12 |
|---------------------------|-------------------------------------------|----|---|---|---|---|---|---|---|---|---|----|----|
| A                         | Active elbow extension (supine/ standing) |    | • | • | • | • | • |   |   |   |   |    |    |
| B                         | Vein pump (spread/collect fingers)        |    | • | • | • | • | • |   |   |   |   |    |    |
| C                         | Rotate forearm (supination/ pronation)    |    | • | • | • | • | • |   |   |   |   |    |    |
| D                         | Lift sternum (retraction of shoulders)    |    | • | • | • | • | • |   |   |   |   |    |    |
| E                         | Head lateral flexion                      |    | • | • | • | • | • |   |   |   |   |    |    |
| F                         | Cervical flexion                          |    | • | • | • | • | • |   |   |   |   |    |    |

Exercises in sling

| Part 2:                                |                                             | Wk | 1 | 2 | 3 | 4 | 5 | 6 | 7 | 8 | 9 | 10 | 12 |
|----------------------------------------|---------------------------------------------|----|---|---|---|---|---|---|---|---|---|----|----|
| <b>Passive range of motion (by PT)</b> |                                             |    |   |   |   |   |   |   |   |   |   |    |    |
| 1                                      | Flexion                                     |    | • | • | • | • | • |   |   |   |   |    |    |
| 2                                      | Abduction                                   |    | • | • | • | • | • |   |   |   |   |    |    |
| 3                                      | Supine external rotation w. 20-60 deg. abd. |    | • | • | • | • | • |   |   |   |   |    |    |
| 4                                      | When needed manual guiding of scapula       |    | • | • | • | • | • |   |   |   |   |    |    |
| 5                                      | When needed manual therapy                  |    | • | • | • | • | • |   |   |   |   |    |    |

PROM

| Assisted active range of motion |                                        | Wk | 1 | 2 | 3 | 4 | 5 | 6 | 7 | 8 | 9 | 10 | 12 |
|---------------------------------|----------------------------------------|----|---|---|---|---|---|---|---|---|---|----|----|
| 6                               | Reach the foot (flexion)               |    |   |   |   | • | • | • | • | • | • |    |    |
| 7                               | Wash the table (flexion on table)      |    |   |   |   |   |   | • | • | • | • | •  |    |
| 8                               | Supine bench press w/ broomstick       |    |   |   |   |   |   |   | • | • | • | •  | •  |
| 9                               | Flexion/ scaption w/ jump rope         |    |   |   |   |   |   |   | • | • | • | •  | •  |
| 10                              | Abduction w/ broomstick                |    |   |   |   |   |   |   | • | • | • | •  | •  |
| 11                              | Supine external rotation w/ broomstick |    |   |   |   |   |   |   | • | • | • | •  | •  |

AAROM

| Active exercise closed and open chain |                                    | Wk | 1 | 2 | 3 | 4 | 5 | 6 | 7 | 8 | 9 | 10 | 12 |
|---------------------------------------|------------------------------------|----|---|---|---|---|---|---|---|---|---|----|----|
| 12                                    | Downward pressure in abduction     |    |   |   |   |   |   | • | • | • | • | •  | •  |
| 13                                    | Low row w/ Thera-Band (extension)  |    |   |   |   |   |   | • | • | • | • | •  | •  |
| 14                                    | Incline plinth sliding (flexion)   |    |   |   |   |   |   | • | • | • | • | •  | •  |
| 15                                    | Sitting bilateral downward press   |    |   |   |   |   |   | • | • | • | • | •  | •  |
| 16                                    | High row with pulley               |    |   |   |   |   |   |   | • | • | • | •  | •  |
| 17                                    | Fitter                             |    |   |   |   |   |   |   | • | • | • | •  | •  |
| 18                                    | Prone low row                      |    |   |   |   |   |   |   | • | • | • | •  | •  |
| 19                                    | Supine scaption on sloping board   |    |   |   |   |   |   |   | • | • | • | •  | •  |
| 20                                    | Supine internal rotation w/ pulley |    |   |   |   |   |   |   | • | • | • | •  | •  |
| 21                                    | Supine external rotation w/ pulley |    |   |   |   |   |   |   | • | • | • | •  | •  |

AROM

Level 1

|    |                                              |  |  |  |  |  |  |  |   |   |   |   |   |
|----|----------------------------------------------|--|--|--|--|--|--|--|---|---|---|---|---|
| 22 | Standing internal rotation w/ pulley         |  |  |  |  |  |  |  | • | • | • | • | • |
| 23 | Lawn mover                                   |  |  |  |  |  |  |  | • | • | • | • | • |
| 24 | Standing external rotation w/ pulley         |  |  |  |  |  |  |  | • | • | • | • | • |
| 25 | Wall slide                                   |  |  |  |  |  |  |  | • | • | • | • | • |
| 26 | Backstroke                                   |  |  |  |  |  |  |  | • | • | • | • | • |
| 27 | Standing arm elevation in scapular plane     |  |  |  |  |  |  |  | • | • | • | • | • |
| 28 | Standing shoulder flexion                    |  |  |  |  |  |  |  | • | • | • | • | • |
| 29 | Sidelying external rotation                  |  |  |  |  |  |  |  | • | • | • | • | • |
| 30 | Sidelying shoulder flexion                   |  |  |  |  |  |  |  | • | • | • | • | • |
| 31 | Prone drop/ grab ball                        |  |  |  |  |  |  |  |   |   |   | • | • |
| 32 | Prone external rotation w. 90 deg. elevation |  |  |  |  |  |  |  |   |   |   | • | • |
| 33 | Standing protraction w/ pulley (throwing)    |  |  |  |  |  |  |  |   |   |   | • | • |
| 34 | Standing retraction w/ pulley (throwing)     |  |  |  |  |  |  |  |   |   |   | • | • |

Level 2

Level 3

## At home

**NOTES**

**Sling week 1-2 postop:**  
Shoulder immobilized in standard fixed sling

**Sling week 3-5 postop:**  
Shoulder immobilized in standard sling

**Repetitions:**  
3 sets of 10 repetitions

**Frequency:**  
Range of motion exercises is performed daily.

Strength exercises is performed on the days without PT training.

**From week 6 both closed and open chain exercises are performed.**

**Specify perceived pain on a scale from 0-10:**

0 equals no pain  
10 equals the worst imaginable

Pain below 5 is permitted during exercise therapy.

Pain should drop to below 2 after exercise therapy.

| <b>Part 1: Tendon protection</b> |                                           | Wk | 1 | 2 | 3 | 4 | 5 | 6 | 7 | 8 | 9 | 10 | 12 |
|----------------------------------|-------------------------------------------|----|---|---|---|---|---|---|---|---|---|----|----|
| <b>A</b>                         | Active elbow extension (supine/ standing) |    | • | • | • | • | • |   |   |   |   |    |    |
| <b>B</b>                         | Vein pump (spread/collect fingers)        |    | • | • | • | • | • |   |   |   |   |    |    |
| <b>C</b>                         | Rotate forearm (supination/ pronation)    |    | • | • | • | • | • |   |   |   |   |    |    |
| <b>D</b>                         | Lift sternum (retraction of shoulders)    |    | • | • | • | • | • |   |   |   |   |    |    |
| <b>E</b>                         | Head lateral flexion                      |    | • | • | • | • | • |   |   |   |   |    |    |
| <b>F</b>                         | Cervical flexion                          |    | • | • | • | • | • |   |   |   |   |    |    |

Exercises in sling

| <b>Part 2:</b>                         |                                        | Wk | 1 | 2 | 3 | 4 | 5 | 6 | 7 | 8 | 9 | 10 | 12 |
|----------------------------------------|----------------------------------------|----|---|---|---|---|---|---|---|---|---|----|----|
| <b>Assisted active range of motion</b> |                                        |    |   |   |   |   |   |   |   |   |   |    |    |
| <b>6</b>                               | Reach the foot (flexion)               |    |   | • | • | • | • |   |   |   |   |    |    |
| <b>7</b>                               | Wash the table (flexion on table)      |    |   | • | • | • | • | • |   |   |   |    |    |
| <b>8</b>                               | Supine bench press w/ broomstick       |    |   | • | • | • | • | • | • |   |   |    |    |
| <b>10</b>                              | Abduction w/ broomstick                |    |   | • | • | • | • | • | • |   |   |    |    |
| <b>11</b>                              | Supine external rotation w/ broomstick |    |   | • | • | • | • | • | • |   |   |    |    |

ASSISTED ACTIVE

**Performed without sling**

| <b>Isometric hold</b> |                                              | Wk | 1 | 2 | 3 | 4 | 5 | 6 | 7 | 8 | 9 | 10 | 12 |
|-----------------------|----------------------------------------------|----|---|---|---|---|---|---|---|---|---|----|----|
| <b>M</b>              | Flexion against wall                         |    |   | • | • | • | • | • |   |   |   |    |    |
| <b>N</b>              | Extension against wall (flexed elbow)        |    |   | • | • | • | • | • |   |   |   |    |    |
| <b>I</b>              | Internal rotation (not subscapularis lesion) |    |   |   |   | • | • | • | • | • |   |    |    |
| <b>J</b>              | External rotation (not infraspinatus lesion) |    |   |   |   | • | • | • | • | • |   |    |    |
| <b>K</b>              | Abduction                                    |    |   |   |   |   |   | • | • | • |   |    |    |

STRENGTH

**Performed without sling**

| <b>Active range of motion</b> |                                               | Wk | 1 | 2 | 3 | 4 | 5 | 6 | 7 | 8 | 9 | 10 | 12 |
|-------------------------------|-----------------------------------------------|----|---|---|---|---|---|---|---|---|---|----|----|
| <b>13</b>                     | Low row w/ Thera-Band (extension)             |    |   |   |   |   |   | • | • | • | • | •  | •  |
| <b>18</b>                     | Prone low row                                 |    |   |   |   |   |   | • | • | • | • | •  | •  |
| <b>35</b>                     | Supine external rotation (hand to neck)       |    |   |   |   |   |   | • | • | • | • | •  | •  |
| <b>36</b>                     | Supine internal rotation (hand to lower back) |    |   |   |   |   |   | • | • | • | • | •  | •  |

ACTIVE

**At home**

**NOTES**

**Sling week 1-2 postop:**  
Shoulder immobilized in standard fixed sling

**Sling week 3-5 postop:**  
Shoulder immobilized in standard sling

**Repetitions:**  
3 sets of 10 repetitions

**Frequency:**  
Range of motion exercises is performed daily.

Strength exercises is performed on the days without PT training.

**From week 6 both closed and open chain exercises are performed.**

**Specify perceived pain on a scale from 0-10:**

0 equals no pain  
10 equals the worst imaginable

Pain below 5 is permitted during exercise therapy.

Pain should drop to below 2 after exercise therapy.

| <b>Part 1: Tendon protection</b> |                                           | Wk | 1 | 2 | 3 | 4 | 5 | 6 | 7 | 8 | 9 | 10 | 12 |
|----------------------------------|-------------------------------------------|----|---|---|---|---|---|---|---|---|---|----|----|
| <b>A</b>                         | Active elbow extension (supine/ standing) |    | • | • | • | • | • |   |   |   |   |    |    |
| <b>B</b>                         | Vein pump (spread/collect fingers)        |    | • | • | • | • | • |   |   |   |   |    |    |
| <b>C</b>                         | Rotate forearm (supination/ pronation)    |    | • | • | • | • | • |   |   |   |   |    |    |
| <b>D</b>                         | Lift sternum (retraction of shoulders)    |    | • | • | • | • | • |   |   |   |   |    |    |
| <b>E</b>                         | Head lateral flexion                      |    | • | • | • | • | • |   |   |   |   |    |    |
| <b>F</b>                         | Cervical flexion                          |    | • | • | • | • | • |   |   |   |   |    |    |

Exercises in sling

| <b>Part 2: Assisted active range of motion</b> |                                        | Wk | 1 | 2 | 3 | 4 | 5 | 6 | 7 | 8 | 9 | 10 | 12 |
|------------------------------------------------|----------------------------------------|----|---|---|---|---|---|---|---|---|---|----|----|
| <b>6</b>                                       | Reach the foot (flexion)               |    |   |   |   | • | • | • | • | • | • |    |    |
| <b>7</b>                                       | Wash the table (flexion on table)      |    |   |   |   |   |   | • | • | • | • | •  |    |
| <b>8</b>                                       | Supine bench press w/ broomstick       |    |   |   |   |   |   | • | • | • | • | •  | •  |
| <b>10</b>                                      | Abduction w/ broomstick                |    |   |   |   |   |   | • | • | • | • | •  | •  |
| <b>11</b>                                      | Supine external rotation w/ broomstick |    |   |   |   |   |   | • | • | • | • | •  | •  |

ASSISTED ACTIVE

| <b>Active range of motion</b> |                                               | Wk | 1 | 2 | 3 | 4 | 5 | 6 | 7 | 8 | 9 | 10 | 12 |
|-------------------------------|-----------------------------------------------|----|---|---|---|---|---|---|---|---|---|----|----|
| <b>13</b>                     | Low row w/ Thera-Band (extension)             |    |   |   |   |   |   | • | • | • | • | •  | •  |
| <b>18</b>                     | Prone low row                                 |    |   |   |   |   |   | • | • | • | • | •  | •  |
| <b>35</b>                     | Supine external rotation (hand to neck)       |    |   |   |   |   |   | • | • | • | • | •  | •  |
| <b>36</b>                     | Supine internal rotation (hand to lower back) |    |   |   |   |   |   | • | • | • | • | •  | •  |

ACTIVE
